# Supplementary material for: The pancreatic tumor microenvironment drives changes in miRNA expression that promote cytokine production and inhibit migration by the tumor associated stroma
Source: PubMed Central journal article supplement (PMC5589562; doi:10.18632/oncotarget.10722), 2016-07-20
Supplement: oncotarget-08-54054-s001.pdf [file oncotarget-08-54054-s001.pdf]

## **The pancreatic tumor microenvironment drives changes in miRNA expression that promote cytokine production and inhibit migration by the tumor associated stroma**

### **SUPPLEMENTARY TABLES**

**Supplementary Table S1: Top 100 Expressed miRNAs for TAS Cell Lines and PC Cell Line L3.6pl**

See Supplementary File 1

**Supplementary Table 2: Information of Primers for real-time PCR**

| Primer ID       | Target sequences         | *Product no. | Batch no. |
|-----------------|--------------------------|--------------|-----------|
| hsa-miR-145-5p  | GUCCAGUUUCCCAGGAAUCCCU   | 204483       | 230863    |
| hsa-miR-199a-5p | CCCAGUGUUCAGACUACCUGUUC  | 204494       | 225157    |
| hsa-miR-199b-5p | CCCAGUGUUUAGACUAUCUGUUC  | 204152       | 232352    |
| hsa-miR-200a-3p | U AACACUGUCUGGUAACGAUGU  | 204707       | 222848    |
| hsa-miR-200b-3p | UAAUACUGCCUGGUA AUGAUGA  | 206071       | 227873    |
| hsa-miR-200c-3p | UAAUACUGCCGGGUA AUGAUGGA | 204482       | 229141    |
| hsa-miR-141-3p  | U AACACUGUCUGGUA AAGAUGG | 204504       | 222854    |
| hsa-miR-429     | UAAUACUGUCUGGUA AAAACCGU | 205901       | 225550    |
| hsa-miR-205-5p  | UCCUUCAU UCCACCGGAGUCUG  | 204487       | 225471    |
| hsa-let-7a-5p   | UGAGGUAGUAGGUUGUAUAGUU   | 205727       | 228552    |
| hsa-let-7b-5p   | UGAGGUAGUAGGUUGUGUGGUU   | 204750       | 228235    |
| cel- miR-39-3p  | UCACCGGGUGUAAAUCAGCUUG   | 203952       | 229853    |

\* miRCURY LNA™ Universal RT microRNA PCR LNA™ PCR primers set (Exiqon, Foster City, CA)
